# Supplementary material
Source: HighWire-hosted journal article supplement (https://bmjopen.bmj.com/content/14/11/e091168)
Supplement: inline-supplementary-material-2 [file inline-supplementary-material-2.pdf]

Supplementary table 1 Involvement activities

|                                                                                                                                     | PUBLIC INVOLVEMENT                       |                                                          | IMPACT                                                                                                             |                                                                            |                                                                       |
|-------------------------------------------------------------------------------------------------------------------------------------|------------------------------------------|----------------------------------------------------------|--------------------------------------------------------------------------------------------------------------------|----------------------------------------------------------------------------|-----------------------------------------------------------------------|
| Activity                                                                                                                            | Level of involvement                     | Study level                                              | Competencies , awareness                                                                                           | Behaviour                                                                  | Daily life                                                            |
| Co-creation workshop: information about study design, data co-analysis, music and exercise co-selection, and co-writing of articles | Involve, collaborate                     | Study design                                             | Appreciation, perspective                                                                                          | Shared goals<br>Framework conditions<br>Shared vision<br>Initiatives       | Research quality<br>Practical use<br>Meaning<br>Network               |
| Co-preparation of focus groups and interviews                                                                                       |                                          | Data collection                                          | Self-efficacy<br>Knowledge about needs                                                                             | Shared goals<br>Shared vision<br>Co-design initiatives                     |                                                                       |
| Co-recruitment of participants for focus groups and interviews                                                                      |                                          |                                                          | Motivation                                                                                                         | Shared vision<br>Shared goals                                              |                                                                       |
| Co-conduct of interviews and focus groups                                                                                           |                                          |                                                          | Self-efficacy<br>Knowledge about needs                                                                             | Shared goals<br>Shared vision<br>Co-design Initiatives                     |                                                                       |
| Co-development of the exercise programme and co-selection of suitable music                                                         | Consult<br>Involve<br>Collaborate<br>Own | Research question<br>Study design<br>Data interpretation | Self-efficacy<br>Appreciation<br>Competencies<br>Motivation<br>Information<br>Perspective<br>Knowledge about needs | Shared goals<br>Shared vision<br>Shared ownership<br>Co-design Initiatives | Reputation<br>Research quality<br>Network<br>Meaning<br>Practical use |
| Co-development of first drafts (videos) of the exercise programme                                                                   | Consult<br>Involve<br>Collaborate<br>Own | Research question<br>Data interpretation                 | Self-efficacy<br>Appreciation<br>Competencies<br>Motivation<br>Knowledge about needs                               | Shared goals<br>Shared vision<br>Shared ownership<br>Co-design Initiatives |                                                                       |
| Co-creation of the exercise programme (dance-part)                                                                                  | Involve<br>Collaborate<br>Own            |                                                          | Self-efficacy<br>Appreciation<br>Competencies<br>Motivation                                                        | Shared ownership<br>Co-design Initiatives                                  |                                                                       |
| Co-evaluation of the exercise programme                                                                                             | Consult<br>Involve<br>Collaborate        | Research question<br>Study design                        | Information<br>Perspective                                                                                         | Shared goals<br>Shared vision                                              |                                                                       |

|                                                                                                                                                                                                           |                                          |                                                                                  |                                                                                                                              |                                                                                                       |                                                                                     |
|-----------------------------------------------------------------------------------------------------------------------------------------------------------------------------------------------------------|------------------------------------------|----------------------------------------------------------------------------------|------------------------------------------------------------------------------------------------------------------------------|-------------------------------------------------------------------------------------------------------|-------------------------------------------------------------------------------------|
|                                                                                                                                                                                                           |                                          | Data collection                                                                  | Knowledge about competencies<br>Knowledge about needs                                                                        | Shared ownership<br>Co-design<br>Initiatives                                                          |                                                                                     |
| Co-analysis of data from interviews and focus groups                                                                                                                                                      | Inform<br>Consult                        | Research question<br>Data analysis                                               | Appreciation<br>Motivation<br>Information<br>Perspective<br>Knowledge about needs                                            | Framework conditions<br>Shared goals<br>Shared vision<br>Co-design                                    | Reputation<br>Research quality<br>Practical use                                     |
| Co-refinement and co-analysis of exercises and music selection                                                                                                                                            | Consult<br>Involve<br>Collaborate<br>Own |                                                                                  | Self-efficacy<br>Appreciation<br>Competencies<br>Motivation                                                                  | Shared goals<br>Shared vision<br>Co-design<br>Initiatives                                             | Reputation<br>Research quality<br>Practical use<br>Network                          |
| Active involvement in video production: video recording of the dance part; conducting interviews to guide the exercise performance and provide information on safety aspects; supporting the organisation | Consult<br>Involve<br>Collaborate<br>Own | Research question<br>Study design<br>Data interpretation                         | Self-efficacy<br>Appreciation<br>Competencies<br>Motivation<br>Information<br>Perspective<br>Knowledge about needs           | Framework conditions<br>Shared goals<br>Shared vision<br>Shared ownership<br>Co-design<br>Initiatives | Visibility<br>Reputation<br>Research quality<br>Network<br>Meaning<br>Practical use |
| Co-creation of posters for scientific conferences                                                                                                                                                         | Inform<br>Consult<br>Involve             | Study design<br>Data analysis<br>Data interpretation<br>Dissemination of results | Self-efficacy<br>Appreciation<br>Motivation<br>Information                                                                   | Shared goals<br>Shared vision<br>Co-design<br>Initiatives                                             | Visibility<br>Reputation<br>Research quality<br>Network<br>Meaning<br>Practical use |
| Co-presentation of scientific posters at events (World-MS-day, OIS-Zam Meeting)                                                                                                                           | Consult<br>Involve<br>Collaborate<br>Own | Data interpretation<br>Dissemination of results                                  | Self-efficacy<br>Appreciation<br>Competencies<br>Motivation<br>Information<br>Perspective<br>Knowledge about<br>Competencies |                                                                                                       |                                                                                     |

|                                                                                                                               |                                                    |                                                                 |                                                                                                                                                    |                                                                               |                                                         |
|-------------------------------------------------------------------------------------------------------------------------------|----------------------------------------------------|-----------------------------------------------------------------|----------------------------------------------------------------------------------------------------------------------------------------------------|-------------------------------------------------------------------------------|---------------------------------------------------------|
|                                                                                                                               |                                                    |                                                                 | Knowledge about needs                                                                                                                              |                                                                               |                                                         |
| Co-organising closing events including the co-creation of flyers, posters, or presentation, and co-presentation at the events | Inform<br>Consult<br>Involve<br>Collaborate<br>Own | Study design<br>Data Interpretation<br>Dissemination of results | Motivation<br>Information<br>Perspective<br>Knowledge about needs<br>Self-efficacy                                                                 |                                                                               |                                                         |
| Co-writing articles for MS patient magazine 'Neue Horizonte'                                                                  | Collaborate<br>Own                                 | Study design<br>Dissemination of results                        | Self-efficacy<br>Appreciation<br>Competencies<br>Motivation<br>Information<br>Perspective<br>Knowledge about competencies<br>Knowledge about needs | Shared goals<br>Shared vision<br>Shared ownership<br>Co-design<br>Initiatives |                                                         |
| Participating in focus groups/interviews                                                                                      | Inform<br>Consult                                  | Research question<br>Study design<br>Data collection            | Self-efficacy<br>Appreciation<br>Competencies<br>Motivation<br>Information<br>Perspective<br>Knowledge about needs                                 | Shared goals<br>Shared vision                                                 | Research quality<br>Network<br>Meaning<br>Practical use |
| Giving interviews for MS magazines, social media, and radio                                                                   | Involve<br>Collaborate<br>Own                      | Dissemination of results                                        | Appreciation<br>Motivation<br>Information<br>Knowledge about needs                                                                                 | Shared goals<br>Shared vision<br>Shared ownership<br>Co-design<br>Initiatives | Visibility<br>Network<br>Meaning<br>Practical use       |
