# Supplementary material
Source: HighWire-hosted journal article supplement (https://bmjopen.bmj.com/content/14/11/e091168)
Supplement: inline-supplementary-material-4 [file inline-supplementary-material-4.pdf]

**Supplementary table 3** Focus group and individual interview guide for Stage 2 (during and after the intervention development)

The guides were modified by the peer interviewers to meet the varying needs of the participants.

|                                                                                                                                                       |
|-------------------------------------------------------------------------------------------------------------------------------------------------------|
| <b>Introduction</b>                                                                                                                                   |
| <ul style="list-style-type: none"><li>• Brief introduction including name and personal background</li></ul>                                           |
| <ul style="list-style-type: none"><li>• Presentation of the project by researchers and stakeholders</li></ul>                                         |
| <ul style="list-style-type: none"><li>• Introduction of exercises developed by researchers and stakeholders</li></ul>                                 |
| <ul style="list-style-type: none"><li>• Overview of discussed topics</li></ul>                                                                        |
| <ul style="list-style-type: none"><li>• Presentation of the draft for intervention development</li></ul>                                              |
| <b>Main part</b>                                                                                                                                      |
| <b>Topic: Exercise selection</b>                                                                                                                      |
| <ul style="list-style-type: none"><li>• How well-suited are the presented exercises to your daily routine?</li></ul>                                  |
| <ul style="list-style-type: none"><li>• How would you rate the difficulty of the exercises?</li></ul>                                                 |
| <ul style="list-style-type: none"><li>• What could be barriers to implementing these exercises in your daily routine?</li></ul>                       |
| <ul style="list-style-type: none"><li>• What additional exercises can you think of that should be integrated into the exercise programme?</li></ul>   |
| <ul style="list-style-type: none"><li>• What motivations do you have for and against performing the presented exercises?</li></ul>                    |
| <ul style="list-style-type: none"><li>• What additional exercising equipment or aids do you consider necessary for an effective workout?</li></ul>    |
| <b>Topic: Music selection</b>                                                                                                                         |
| <ul style="list-style-type: none"><li>• How do you feel about the music choices featured in the videos?</li></ul>                                     |
| <ul style="list-style-type: none"><li>• Which of your favourite music selections would you like to see included?</li></ul>                            |
| <ul style="list-style-type: none"><li>• In what ways do you find this music beneficial for exercising?</li></ul>                                      |
| <ul style="list-style-type: none"><li>• Are there any drawbacks you perceive from using this music during exercising?</li></ul>                       |
| <b>Topic: Exercise content</b>                                                                                                                        |
| <ul style="list-style-type: none"><li>• How clear and easy to follow do you find the exercise instructions?</li></ul>                                 |
| <ul style="list-style-type: none"><li>• Are the exercises appropriately tailored to your level of ability? Please elaborate.</li></ul>                |
| <ul style="list-style-type: none"><li>• Do you feel the exercises are effective in meeting your physical activity needs</li></ul>                     |
| <b>Topic: Personalisation and relevance</b>                                                                                                           |
| <ul style="list-style-type: none"><li>• How relevant do you feel the exercises are to your personal goals and needs?</li></ul>                        |
| <ul style="list-style-type: none"><li>• Would you like to see more customisation options in the exercises? If so, what kind?</li></ul>                |
| <ul style="list-style-type: none"><li>• Are there any specific elements or features you would like to see incorporated into this programme?</li></ul> |

|                                                                                                                                                                   |
|-------------------------------------------------------------------------------------------------------------------------------------------------------------------|
| <ul style="list-style-type: none"><li>• Is there anything you would change or add to the music-supported exercise exercises to improve your experience?</li></ul> |
| <b>Conclusion</b>                                                                                                                                                 |
| <ul style="list-style-type: none"><li>• Can you provide a brief summary of your thoughts on the discussion?</li></ul>                                             |
| <ul style="list-style-type: none"><li>• Do you have any comments or questions to share?</li></ul>                                                                 |
| <ul style="list-style-type: none"><li>• If you have further questions or suggestions, please feel free to contact us by email or telephone</li></ul>              |
| <ul style="list-style-type: none"><li>• Thank you and farewell.</li></ul>                                                                                         |
