# Supplementary material
Source: HighWire-hosted journal article supplement (https://bmjopen.bmj.com/content/14/11/e091168)
Supplement: inline-supplementary-material-5 [file inline-supplementary-material-5.pdf]

**Supplementary table 4** Focus group and individual interview guide for Stage 3 (evaluation of completed videos)

The guides were modified by the peer interviewers to meet the varying needs of the participants.

|                                                                                                                                                                                                              |
|--------------------------------------------------------------------------------------------------------------------------------------------------------------------------------------------------------------|
| <b>Introduction</b>                                                                                                                                                                                          |
| <ul style="list-style-type: none"><li>• Brief introduction including name and personal background</li></ul>                                                                                                  |
| <ul style="list-style-type: none"><li>• Presentation of the project by researchers and stakeholders</li></ul>                                                                                                |
| <ul style="list-style-type: none"><li>• Introduction of exercise videos developed by researchers and stakeholders</li></ul>                                                                                  |
| <ul style="list-style-type: none"><li>• Overview of discussed topics</li></ul>                                                                                                                               |
| <ul style="list-style-type: none"><li>• Presentation of the initial videos containing the music-supported exercises</li></ul>                                                                                |
| <b>Main part</b>                                                                                                                                                                                             |
| <b>Topic: General feedback on initial videos</b>                                                                                                                                                             |
| <ul style="list-style-type: none"><li>• Can you describe your overall perception of the music-supported exercise videos?</li></ul>                                                                           |
| <ul style="list-style-type: none"><li>• What aspects of the videos do you find most enjoyable?</li></ul>                                                                                                     |
| <ul style="list-style-type: none"><li>• What aspects of the videos do you find most helpful?</li></ul>                                                                                                       |
| <ul style="list-style-type: none"><li>• Are there any elements of the videos that you find challenging?</li></ul>                                                                                            |
| <ul style="list-style-type: none"><li>• Are there any elements of the videos that you find unhelpful?</li></ul>                                                                                              |
| <ul style="list-style-type: none"><li>• What additional aspects should be considered for the final video recording/processing?</li></ul>                                                                     |
| <b>Topic: Music elements</b>                                                                                                                                                                                 |
| <ul style="list-style-type: none"><li>• How do you feel about the music choices featured in the videos?</li></ul>                                                                                            |
| <ul style="list-style-type: none"><li>• How you feel that the music choice matches with the exercises?</li></ul>                                                                                             |
| <ul style="list-style-type: none"><li>• How do you think the music in the videos will influence your enjoyment while exercising?</li></ul>                                                                   |
| <ul style="list-style-type: none"><li>• How do you think the music in the videos will influence your motivation while exercising?</li></ul>                                                                  |
| <b>Topic: Exercise videos</b>                                                                                                                                                                                |
| <ul style="list-style-type: none"><li>• What are your thoughts on the visual designs used in the videos?</li></ul>                                                                                           |
| <ul style="list-style-type: none"><li>• What changes do you suggest for camera settings or the filming environment?</li></ul>                                                                                |
| <ul style="list-style-type: none"><li>• What accessibility features should be included to ensure a user-friendly experience (e.g., close-up shots, subtitles, volume control, announcement texts)?</li></ul> |
| <ul style="list-style-type: none"><li>• Would you like to see more customisation options in the videos? If so, what kind?</li></ul>                                                                          |
| <ul style="list-style-type: none"><li>• How do these videos compare to other exercise resources you have used?</li></ul>                                                                                     |
| <ul style="list-style-type: none"><li>• What additional support or resources might help you in using these exercise videos effectively?</li></ul>                                                            |
| <b>Topic: Structure and overall impression</b>                                                                                                                                                               |
| <ul style="list-style-type: none"><li>• How do you rate the explanation and description of the exercises in the videos?</li></ul>                                                                            |
| <ul style="list-style-type: none"><li>• What improvements do you suggest for the presentation and moderation?</li></ul>                                                                                      |

|                                                                                                                                                                |
|----------------------------------------------------------------------------------------------------------------------------------------------------------------|
| <ul style="list-style-type: none"><li>• Are there any specific elements or features you would like to see incorporated into this programme?</li></ul>          |
| <ul style="list-style-type: none"><li>• Is there anything you would change or add to the music-supported exercise videos to enhance your experience?</li></ul> |
| <b>Conclusion</b>                                                                                                                                              |
| <ul style="list-style-type: none"><li>• Can you provide a brief summary of your thoughts on the discussion?</li></ul>                                          |
| <ul style="list-style-type: none"><li>• Do you have any comments or questions to share?</li></ul>                                                              |
| <ul style="list-style-type: none"><li>• If you have further questions or suggestions, please feel free to contact us by email or telephone</li></ul>           |
| <ul style="list-style-type: none"><li>• Thank you and farewell.</li></ul>                                                                                      |
