# Supplementary material
Source: HighWire-hosted journal article supplement (https://bmjopen.bmj.com/content/14/11/e091168)
Supplement: inline-supplementary-material-7 [file inline-supplementary-material-7.pdf]

Supplementary file 1

Good Reporting of A Mixed Methods Study (GRAMMS) checklist

Developed from:

O'Cathain A, Murphy E, Nicholl J. The quality of mixed methods studies in health services research. J Health Serv Res Policy. 2008;13(2):92-8.

| Item                                                                                        | Reported page #             |
|---------------------------------------------------------------------------------------------|-----------------------------|
| Describe the justification for using a mixed methods approach to the research question      | 5-6                         |
| Describe the design in terms of the purpose, priority and sequence of methods               | 6                           |
| Describe each method in terms of sampling, data collection and analysis                     | 7-10                        |
| Describe where integration has occurred, how it has occurred and who has participated in it | 19                          |
| Describe any limitation of one method associated with the present of the other method       | Strengths & Limitations, 23 |
| Describe any insights gained from mixing or integrating methods                             | 20-22                       |
