# Supplementary material
Source: HighWire-hosted journal article supplement (https://bmjopen.bmj.com/content/14/11/e091168)
Supplement: inline-supplementary-material-8 [file inline-supplementary-material-8.pdf]

Supplementary file 2

Consolidated criteria for reporting qualitative studies (COREQ): 32-item checklist

Developed from:  
Tong A, Sainsbury P, Craig J. Consolidated criteria for reporting qualitative research (COREQ): a 32-item checklist for interviews and focus groups. *International Journal for Quality in Health Care*. 2007. Volume 19, Number 6: pp. 349 – 357.

| No. Item                                    | Guide questions/description                                                                                                                | Reported on page # |
|---------------------------------------------|--------------------------------------------------------------------------------------------------------------------------------------------|--------------------|
| Domain 1: Research team and reflexivity     |                                                                                                                                            |                    |
| Personal Characteristics                    |                                                                                                                                            |                    |
| 1. Inter viewer/facilitator                 | Which author/s conducted the interview or focus group?                                                                                     | 6                  |
| 2. Credentials                              | What were the researcher’s credentials?<br>E.g. PhD, MD                                                                                    | 6                  |
| 3. Occupation                               | What was their occupation at the time of the study?                                                                                        | 6                  |
| 4. Gender                                   | Was the researcher male or female?                                                                                                         | 6                  |
| 5. Experience and training                  | What experience or training did the researcher have?                                                                                       | 6                  |
| Relationship with participants              |                                                                                                                                            |                    |
| 6. Relationship established                 | Was a relationship established prior to study commencement?                                                                                | 7-8                |
| 7. Participant knowledge of the interviewer | What did the participants know about the researcher? e.g. personal goals, reasons for doing the research                                   | 7-8                |
| 8. Interviewer characteristics              | What characteristics were reported about the inter viewer/facilitator? e.g. Bias, assumptions, reasons and interests in the research topic | 7-8                |
| Domain 2: study design                      |                                                                                                                                            |                    |

|                                          |                                                                                                                                                          |                            |
|------------------------------------------|----------------------------------------------------------------------------------------------------------------------------------------------------------|----------------------------|
| <i>Theoretical framework</i>             |                                                                                                                                                          |                            |
| 9. Methodological orientation and Theory | What methodological orientation was stated to underpin the study? e.g. grounded theory, discourse analysis, ethnography, phenomenology, content analysis | 7-8                        |
| <i>Participant selection</i>             |                                                                                                                                                          |                            |
| 10. Sampling                             | How were participants selected? e.g. purposive, convenience, consecutive, snowball                                                                       | 7                          |
| 11. Method of approach                   | How were participants approached? e.g. face-to-face, telephone, mail, email                                                                              | 7                          |
| 12. Sample size                          | How many participants were in the study?                                                                                                                 | 8                          |
| 13. Non-participation                    | How many people refused to participate or dropped out? Reasons?                                                                                          | 11                         |
| <i>Setting</i>                           |                                                                                                                                                          |                            |
| 14. Setting of data collection           | Where was the data collected? e.g. home, clinic, workplace                                                                                               | 7-8                        |
| 15. Presence of non-participants         | Was anyone else present besides the participants and researchers?                                                                                        | 8                          |
| 16. Description of sample                | What are the important characteristics of the sample? e.g. demographic data, date                                                                        | Table 1                    |
| <i>Data collection</i>                   |                                                                                                                                                          |                            |
| 17. Interview guide                      | Were questions, prompts, guides provided by the authors? Was it pilot tested?                                                                            | Supplementary files<br>1-3 |
| 18. Repeat interviews                    | Were repeat inter views carried out? If yes, how many?                                                                                                   | 8                          |
| 19. Audio/visual recording               | Did the research use audio or visual recording to collect the data?                                                                                      | 9                          |

|                                        |                                                                                                                                 |                       |
|----------------------------------------|---------------------------------------------------------------------------------------------------------------------------------|-----------------------|
| 20. Field notes                        | Were field notes made during and/or after the interview or focus group?                                                         | 9                     |
| 21. Duration                           | What was the duration of the inter views or focus group?                                                                        | 9                     |
| 22. Data saturation                    | Was data saturation discussed?                                                                                                  | 7-8                   |
| 23. Transcripts returned               | Were transcripts returned to participants for comment and/or correction?                                                        | Data co-analysis 7    |
| <b>Domain 3: analysis and findings</b> |                                                                                                                                 |                       |
| <i>Data analysis</i>                   |                                                                                                                                 |                       |
| 24. Number of data coders              | How many data coders coded the data?                                                                                            | 10                    |
| 25. Description of the coding tree     | Did authors provide a description of the coding tree?                                                                           | Supplementary table 5 |
| 26. Derivation of themes               | Were themes identified in advance or derived from the data?                                                                     | 10                    |
| 27. Software                           | What software, if applicable, was used to manage the data?                                                                      | 10                    |
| 28. Participant checking               | Did participants provide feedback on the findings?                                                                              | Data co-analysis 7    |
| <i>Reporting</i>                       |                                                                                                                                 |                       |
| 29. Quotations presented               | Were participant quotations presented to illustrate the themes/findings? Was each quotation identified? e.g. participant number | 12-19                 |
| 30. Data and findings consistent       | Was there consistency between the data presented and the findings?                                                              | 12-19                 |
| 31. Clarity of major themes            | Were major themes clearly presented in the findings?                                                                            | 12-19                 |
| 32. Clarity of minor themes            | Is there a description of diverse cases or discussion of minor themes?                                                          | 12-19                 |
