# Supplementary material
Source: HighWire-hosted journal article supplement (https://bmjopen.bmj.com/content/14/11/e091168)
Supplement: inline-supplementary-material-9 [file inline-supplementary-material-9.pdf]

Supplementary file 3

Guidance for Reporting Involvement of Patients and the Public (GRIPP2) Checklist

Developed from:

Staniszewska S, Brett J, Simera I, Seers K, Mockford C, Goodlad S, et al. GRIPP2 reporting checklists: tools to improve reporting of patient and public involvement in research. *Res Involv Engagem*. 2017;3:13.

| Section and topic                   | Item                                                                                         | Reported page # |
|-------------------------------------|----------------------------------------------------------------------------------------------|-----------------|
| Section 1: Abstract of paper        |                                                                                              |                 |
| 1a: Aim                             | Report the aim of the study                                                                  | 2               |
| 1b: Methods                         | Describe the methods used by which patients and the public were involved                     | 2               |
| 1c: Results                         | Report the impacts and outcomes of PPI in the study                                          | 2-3             |
| 1d: Conclusions                     | Summarise the main conclusions of the study                                                  | 3               |
| 1e: Keywords                        | Include PPI, “patient and public involvement,” or alternative terms as keywords              | 3               |
| Section 2: Background to paper      |                                                                                              |                 |
| 2a: Definition                      | Report the definition of PPI used in the study and how it links to comparable studies        | 7               |
| 2b: Theoretical underpinnings       | Report the theoretical rationale and any theoretical influences relating to PPI in the study | 6               |
| 2c: Concepts and theory development | Report any conceptual models or influences used in the study                                 | 6               |
| Section 3: Aims of paper            |                                                                                              |                 |
| 3: Aim                              | Report the aim of the study                                                                  | 6               |
| Section 4: Methods of paper         |                                                                                              |                 |

| Section and topic                                      | Item                                                                                                  | Reported page #            |
|--------------------------------------------------------|-------------------------------------------------------------------------------------------------------|----------------------------|
| 4a: Design                                             | Provide a clear description of methods by which patients and the public were involved                 | 6-9, supplementary table 1 |
| 4b: People involved                                    | Provide a description of patients, carers, and the public involved with the PPI activity in the study | 7-8                        |
| 4c: Stages of involvement                              | Report on how PPI is used at different stages of the study                                            | 7-9                        |
| 4d: Level or nature of involvement                     | Report the level or nature of PPI used at various stages of the study                                 | 7-9, supplementary table 1 |
| <i>Section 5: Capture or measurement of PPI impact</i> |                                                                                                       |                            |
| 5a: Qualitative evidence of impact                     | If applicable, report the methods used to qualitatively explore the impact of PPI in the study        | 8-9                        |
| 5b: Quantitative evidence of impact                    | If applicable, report the methods used to quantitatively measure or assess the impact of PPI          | 9-10                       |
| 5c: Robustness of measure                              | If applicable, report the rigour of the method used to capture or measure the impact of PPI           | 9-10                       |
| <i>Section 6: Economic assessment</i>                  |                                                                                                       |                            |
| 6: Economic assessment                                 | If applicable, report the method used for an economic assessment of PPI                               | Not applicable             |
| <i>Section 7: Study results</i>                        |                                                                                                       |                            |
| 7a: Outcomes of PPI                                    | Report the results of PPI in the study, including both positive and negative outcomes                 | 11-20                      |
| 7b: Impacts of PPI                                     | Report the positive and negative impacts that PPI has had on the research, the individuals            | 19-20                      |

| Section and topic                            | Item                                                                                                                                                                                          | Reported page # |
|----------------------------------------------|-----------------------------------------------------------------------------------------------------------------------------------------------------------------------------------------------|-----------------|
|                                              | involved (including patients and researchers), and wider impacts                                                                                                                              |                 |
| 7c: Context of PPI                           | Report the influence of any contextual factors that enabled or hindered the process or impact of PPI                                                                                          | 7-9, 18-21      |
| 7d: Process of PPI                           | Report the influence of any process factors, that enabled or hindered the impact of PPI                                                                                                       | 7-9, 18-21      |
| 7ei: Theory development                      | Report any conceptual or theoretical development in PPI that have emerged                                                                                                                     | Not applicable  |
| 7eii: Theory development                     | Report evaluation of theoretical models, if any                                                                                                                                               | Not applicable  |
| 7f: Measurement                              | If applicable, report all aspects of instrument development and testing (eg, validity, reliability, feasibility, acceptability, responsiveness, interpretability, appropriateness, precision) | Not applicable  |
| 7g: Economic assessment                      | Report any information on the costs or benefit of PPI                                                                                                                                         | 7               |
| <i>Section 8: Discussion and conclusions</i> |                                                                                                                                                                                               |                 |
| 8a: Outcomes                                 | Comment on how PPI influenced the study overall. Describe positive and negative effects                                                                                                       | 20-21           |
| 8b: Impacts                                  | Comment on the different impacts of PPI identified in this study and how they contribute to new knowledge                                                                                     | 20-21           |
| 8c: Definition                               | Comment on the definition of PPI used (reported in the Background section) and whether or not you would suggest any changes                                                                   | 20-23           |

| Section and topic                         | Item                                                                                                                                      | Reported page # |
|-------------------------------------------|-------------------------------------------------------------------------------------------------------------------------------------------|-----------------|
| 8d: Theoretical underpinnings             | Comment on any way your study adds to the theoretical development of PPI                                                                  | 20-23           |
| 8e: Context                               | Comment on how context factors influenced PPI in the study                                                                                | 20              |
| 8f: Process                               | Comment on how process factors influenced PPI in the study                                                                                | 20-21           |
| 8g: Measurement and capture of PPI impact | If applicable, comment on how well PPI impact was evaluated or measured in the study                                                      | 20-21, 23       |
| 8h: Economic assessment                   | If applicable, discuss any aspects of the economic cost or benefit of PPI, particularly any suggestions for future economic modelling.    | Not applicable  |
| 8i: Reflections/critical perspective      | Comment critically on the study, reflecting on the things that went well and those that did not, so that others can learn from this study | 23-24           |

PPI, patient and public involvement.
