# Supplementary material
Source: HighWire-hosted journal article supplement (https://bmjopen.bmj.com/content/14/11/e091168)

Supplementary Figure 1. Roles of stakeholders and participants in study activities and events

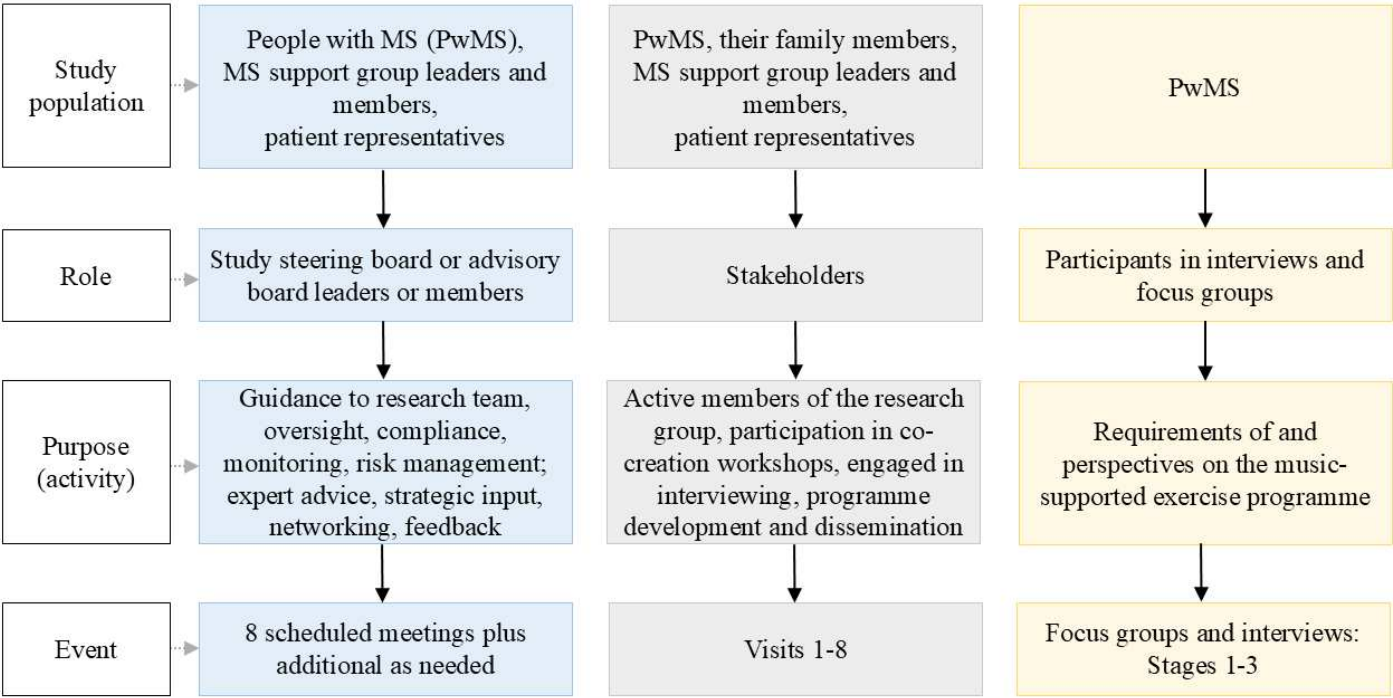

Supplement: inline-supplementary-material-1 [file inline-supplementary-material-1.pdf]
